# Supplementary material for: Scope and Limitations of Exploiting the Ability of the Chemosensitizer NV716 to Enhance the Activity of Tetracycline Derivatives against Pseudomonas aeruginosa
Source: MDPI journal article supplement (doi:10.3390/molecules28114262), 2023-05-23
Supplement: s1 [file s1]

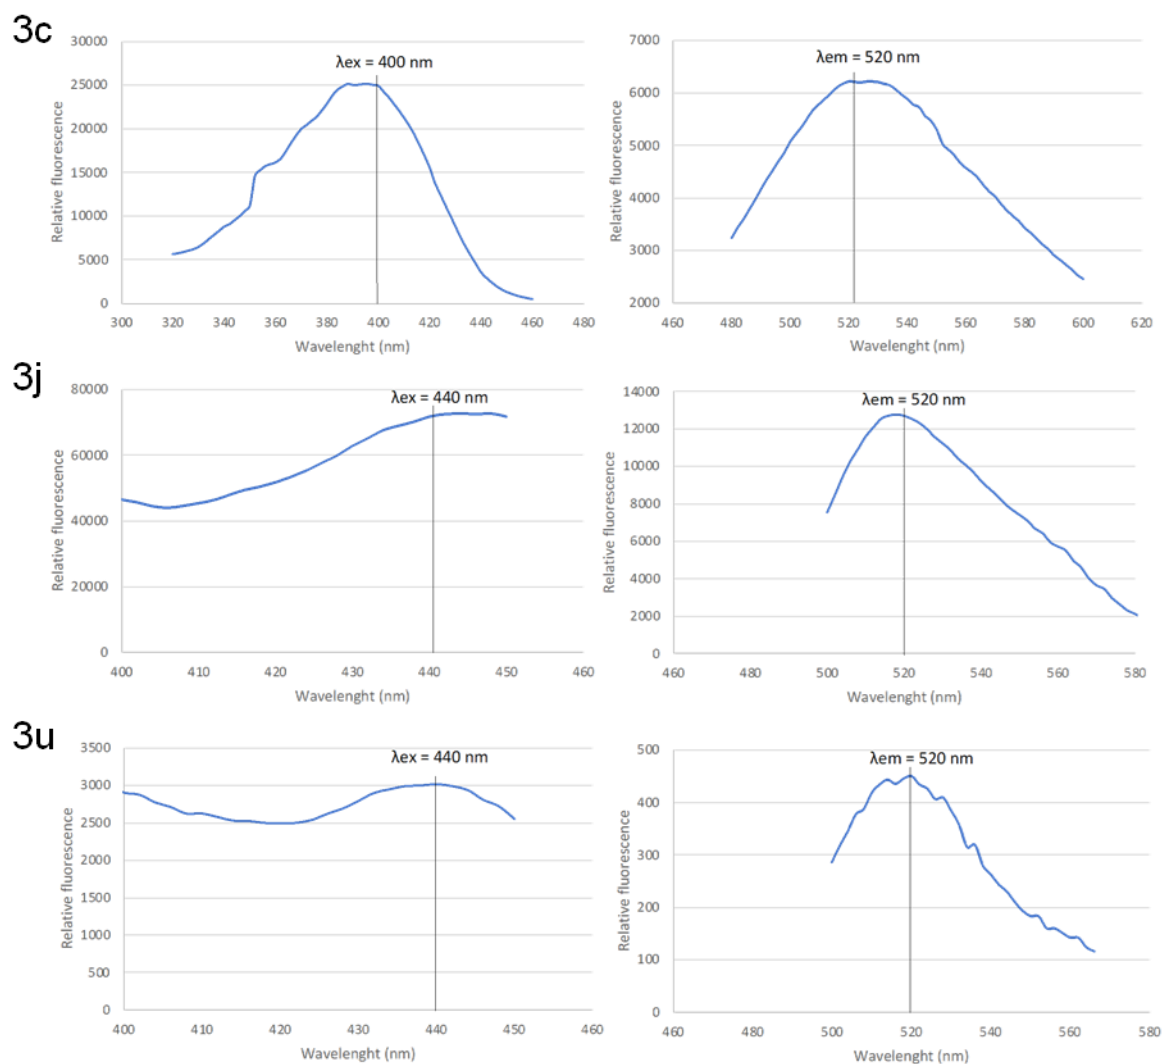

**Figure S1.** Excitation and emission spectra of compounds **3c**, **3j**, and **3u**.

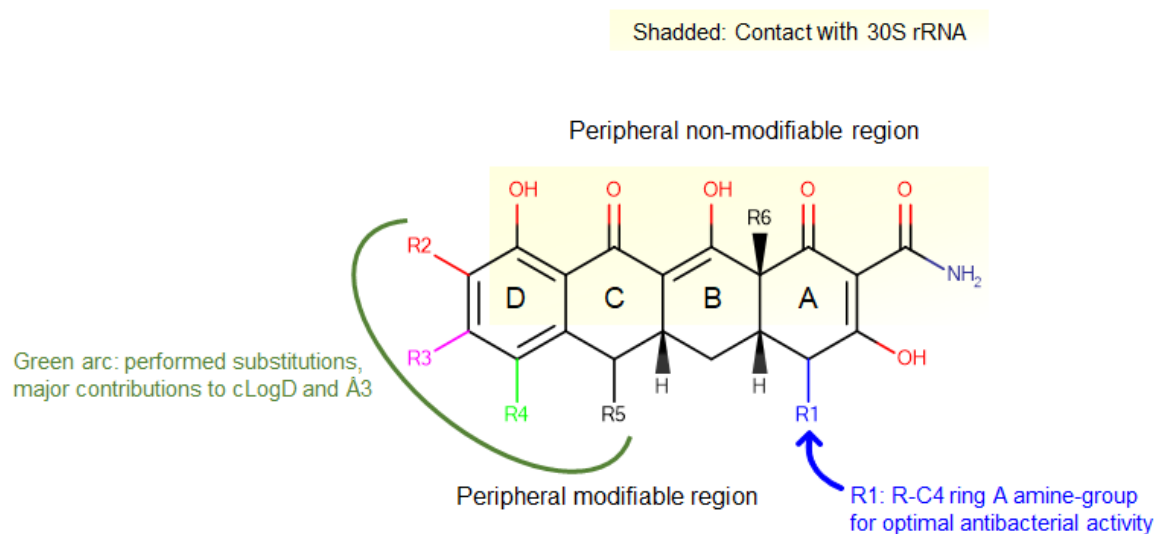

**Figure S2.** Structure-activity relationship of tetracyclines.

**Table S1.** List of tetracycline derivatives. Molecules in bold font (**3c**, **3j**, and **3u**) were selected for uptake assays shown in Figure 4 and/or *in vitro* expression assays shown in Figure 5.

| Name                                             | n°        | MIC (µg/mL)      |                       | Fold reduction<br>in MIC | cLogD pH<br>7.4 |
|--------------------------------------------------|-----------|------------------|-----------------------|--------------------------|-----------------|
|                                                  |           | without<br>NV716 | with NV716<br>(10 µM) |                          |                 |
| Chlortetracycline                                | 3a        | 6.25             | 0.7                   | 9                        | -4.3            |
| Demeclocycline                                   | 3b        | 6.25             | 0.4                   | 16                       | -3.9            |
| <b>Doxycycline</b>                               | <b>3c</b> | <b>12.5</b>      | <b>0.2</b>            | <b>63</b>                | <b>-2.7</b>     |
| RCT                                              | 3d        | 200              | 6.25                  | 32                       | -2.8            |
| RT                                               | 3e        | 400              | 12.5                  | 32                       | -2.8            |
| RDOX                                             | 3f        | 400              | 25                    | 16                       | -2.7            |
| 7-iodo-RDOX                                      | 3g        | 400              | 6.25                  | 64                       | -2.5            |
| 9-iodo-RDOX                                      | 3h        | 400              | 12.5                  | 32                       | -2.8            |
| RDMC                                             | 3i        | 200              | 6.25                  | 32                       | -2.4            |
| <b>Col3</b>                                      | <b>3j</b> | <b>400</b>       | <b>3.125</b>          | <b>128</b>               | <b>-1.95</b>    |
| DDOX                                             | 3k        | 400              | 25                    | 16                       | -1.8            |
| 9-(4-methoxy-phenyl)-RDOX                        | 3l        | 400              | 6.25                  | 64                       | -1.8            |
| 9-(3,4-dimethoxyphenyl)-RDOX                     | 3m        | 400              | 6.25                  | 64                       | -1.8            |
| 9-(3,4,5-trimethoxyphenyl)-<br>RDOX              | 3n        | 400              | 6.25                  | 64                       | -1.8            |
| DDMC                                             | 3o        | 250              | 50                    | 5                        | -1.9            |
| DCT                                              | 3p        | 400              | 100                   | 4                        | -1.6            |
| 9-(2-hydroxyphenyl)-RDOX                         | 3q        | 400              | 12.5                  | 32                       | -1.75           |
| 9-(3-hydroxyphenyl)-RDOX                         | 3r        | 400              | 25                    | 16                       | -1.75           |
| 9-(2-furanyl)-RDOX                               | 3s        | 400              | 400                   | 1                        | -1.4            |
| 9-(3,4-methylenedioxyphenyl)-<br>RDOX            | 3t        | 400              | 400                   | 1                        | -1.2            |
| -                                                | <b>3u</b> | <b>400</b>       | <b>400</b>            | <b>1</b>                 | <b>-1.08</b>    |
| (Z)-9-(2-(hydroxymethyl)-hex-1-<br>en-1-yl)-RDOX | 3v        | 400              | 400                   | 1                        | -0.9            |
| 9-phenyl-RDOX                                    | 3w        | 400              | 400                   | 1                        | -0.89           |
| 9-tertButyl-Dox-HCl                              | 3x        | 400              | 400                   | 1                        | -0.85           |
| 9-(2-thiophenyl)-RDOX                            | 3y        | 400              | 400                   | 1                        | -0.5            |
| 9-(2-furanyl)-RDOX                               | 3z        | 400              | 400                   | 1                        | -0.3            |
| 9-(2-naphthyl)-RDOX                              | 3aa       | 400              | 400                   | 1                        | 0.2             |
| 9-(3-benzyloxyphenyl)-RDOX                       | 3ab       | 400              | 400                   | 1                        | 0.5             |
